# Supplementary material for: Efficacy of Conventional and Organic Insecticides against Scaphoideus titanus: Field and Semi-Field Trials
Source: MDPI journal article supplement (doi:10.3390/insects14020101), 2023-01-17
Supplement: s1 [file s1]

**Table S2.** Results of semi-field trials: Abbott efficacy on *S. titanus* adults confined on plants three and seven days after insecticide application.

| Active ingredients        | Confined three days<br>after insecticide application |        |         | Confined seven days<br>after insecticide application |        |         |
|---------------------------|------------------------------------------------------|--------|---------|------------------------------------------------------|--------|---------|
|                           | Padova                                               | Verona | Average | Padova                                               | Verona | Average |
| Acetamiprid               | 55.0%                                                | 80.0%  | 67.5%   | 63.9%                                                | 76.7%  | 70.3%   |
| Acrinathrin               | 100.0%                                               |        |         | 100.0%                                               |        |         |
| Azadirachtin              | 0.0%                                                 |        |         | -5.6%                                                |        |         |
| <i>Beauveria bassiana</i> | 0.0%                                                 |        |         | -2.8%                                                |        |         |
| Deltamethrin              | 85.0%                                                | 100.0% | 92.5%   | 80.6%                                                | 100.0% | 90.3%   |
| Etofenprox                | 95.0%                                                | 76.7%  | 85.9%   | 63.9%                                                | 50.0%  | 57.0%   |
| Flupyradifurone           | 55.0%                                                | 90.0%  | 72.5%   | 11.1%                                                | 70.0%  | 40.6%   |
| Lambda-cyhalothrin        | 95.0%                                                | 100.0% | 97.5%   | 100.0%                                               | 83.3%  | 91.7%   |
| Pyrethrins                | 5.0%                                                 | 23.3%  | 14.2%   | -8.3%                                                | 10.0%  | 0.9%    |
| Sulfoxaflor               | 60.0%                                                | 100.0% | 80.0%   | 58.3%                                                | 70.0%  | 64.2%   |
| Tau-fluvalinate           | 50.0%                                                | 93.3%  | 71.7%   | 30.6%                                                | 80.0%  | 55.3%   |
