# Supplementary material for: Efficacy of Conventional and Organic Insecticides against Scaphoideus titanus: Field and Semi-Field Trials
Source: MDPI journal article supplement (doi:10.3390/insects14020101), 2023-01-17
Supplement: s1 [file s1]

**Table S3.** Results of field trials: Abbott efficacy on *S. titanus* nymphs confined on plants three and seven days after insecticide application.

| Active ingredients | Confined three days<br>after insecticide application |       |         | Confined seven days<br>after insecticide application |       |         |
|--------------------|------------------------------------------------------|-------|---------|------------------------------------------------------|-------|---------|
|                    | 2021                                                 | 2022  | Average | 2021                                                 | 2022  | Average |
| Acetamiprid        | 17.5%                                                | 10.8% | 14.2%   | -2,6%                                                | 0.0%  | 0.0%    |
| Acrinathrin        | 85.0%                                                | 91.9% | 88.5%   | 66.7%                                                | 54.1% | 60.4%   |
| Deltamethrin       |                                                      | 83.8% |         |                                                      | 16.2% |         |
| Etofenprox         |                                                      | 59.5% |         |                                                      | 0.0%  |         |
| Flupyradifurone    | 10.0%                                                | 27.0% | 18.5%   | 0%                                                   | -2.7% | -1.4%   |
| Sulfoxaflor        |                                                      | 27.7% |         |                                                      | -2.7% |         |
| Tau-fluvalinate    | 27.5%                                                | 29.7% | 28.6%   | 5.1%                                                 | 0.0%  | 2.6%    |
