# Supplementary material for: Efficacy of Conventional and Organic Insecticides against Scaphoideus titanus: Field and Semi-Field Trials
Source: MDPI journal article supplement (doi:10.3390/insects14020101), 2023-01-17
Supplement: s1 [file s1]

**Table S4.** Results of field trials: Abbott efficacy on *S. titanus* adults confined on plants three and seven days after insecticide application.

| Active ingredients | Confined three days<br>after insecticide application |       |         | Confined seven days<br>after insecticide application |       |         |
|--------------------|------------------------------------------------------|-------|---------|------------------------------------------------------|-------|---------|
|                    | 2021                                                 | 2022  | Average | 2021                                                 | 2022  | Average |
| Acetamiprid        | 32.4%                                                | 10.3% | 21.4%   | -8.8%                                                | 5.3%  | -1.8%   |
| Acrinathrin        | 73.0%                                                | 15.4% | 44.2%   | 76.5%                                                | 13.2% | 44.9%   |
| Deltamethrin       |                                                      | 0.0%  |         |                                                      | 5.3%  |         |
| Etofenprox         |                                                      | 5.1%  |         |                                                      | 15.8% |         |
| Flupyradifurone    | 21.6%                                                | 15.4% | 18.5%   | 11.8%                                                | 18.4% | 15.1%   |
| Sulfoxaflor        |                                                      | 12.8% |         |                                                      | 5.3%  |         |
| Tau-fluvalinate    | 13.5%                                                | 5.1%  | 9.3%    | -8.8%                                                | 15.8% | -8.8%   |
