# Supplementary material for: Efficacy of Conventional and Organic Insecticides against Scaphoideus titanus: Field and Semi-Field Trials
Source: MDPI journal article supplement (doi:10.3390/insects14020101), 2023-01-17
Supplement: s1 [file s1]

**Table S1.** Results of semi-field trials: Abbott efficacy on *S. titanus* nymphs confined on plants three and seven days after insecticide application.

| Active ingredients        | Confined three days<br>after insecticide application |        |         | Confined seven days<br>after insecticide application |        |         |
|---------------------------|------------------------------------------------------|--------|---------|------------------------------------------------------|--------|---------|
|                           | Padova                                               | Verona | Average | Padova                                               | Verona | Average |
| Acetamiprid               | 44.7%                                                | 72.4%  | 58.6%   | 35.0%                                                | 53.6%  | 44.3%   |
| Acrinathrin               | 84.2%                                                |        |         | 95.0%                                                |        |         |
| Azadirachtin              | 13.2%                                                | -3.4%  | 4.9%    | 5.0%                                                 | -3.6%  | 0.7%    |
| <i>Beauveria bassiana</i> | 0.0%                                                 | 3.4%   | 1.7%    | 10.0%                                                | -7.1%  | 1.5%    |
| Deltamethrin              | 63.2%                                                | 79.3%  | 71.3%   | 40.0%                                                | 39.3%  | 39.7%   |
| Etofenprox                | 55.3%                                                | 65.5%  | 60.4%   | 55.0%                                                | 67.9%  | 61.5%   |
| Flupyradifurone           | 50.0%                                                | 69.0%  | 59.5%   | 27.5%                                                | 57.1%  | 42.3%   |
| Lambda-cyhalothrin        | 71.1%                                                | 100.0% | 85.6%   | 72.5%                                                | 57.1%  | 64.8%   |
| Pyrethrins                | -2.5%                                                | 6.9%   | 2.2%    | 2.5%                                                 | -3.6%  | -0.6%   |
| Sulfoxaflor               | 71.1%                                                | 75.9%  | 73.5%   | 57.5%                                                | 64.3%  | 60.9%   |
| Tau-fluvalinate           | 55.3%                                                | 79.3%  | 67.3%   | 52.6%                                                | 53.6%  | 53.1%   |
